# Supplementary material
Source: publisher figshare collection journal article supplement (https://gsapubs.figshare.com/ndownloader/files/22411326)
Supplement: Supplementary file 1 [file 22411326]

Fig. 1. a) A structure contour map displaying part of the dome structure where the directional boreholes (X-01, X-02, X-03 and X-04) are drilled into the Arab reservoirs, b) 3-D view of the directional boreholes, c) fracture strikes and dips measured from the borehole images. Fracture strikes indicate that the boreholes missed or reduced number of the fractures parallel to the boreholes, but the strike measurements from the 4 boreholes follow the NW-SE, E-W, and NE-SW fracture systems that were previously recognized in the carbonate reservoirs in Eastern Arabia. Fracture roughness is studied from the core obtained from X-01 and X-03.

Fig. 2. At left, a column of the described reservoir rock facies, at right, a layout for the interpreted fractures (unfilled and filled). Comparing fractures directly between core and borehole images indicated that borehole imaging of fractures is influenced by fracture roughness and other several factors discussed thoroughly in (Al-Fahmi & Cartwright, 2017).


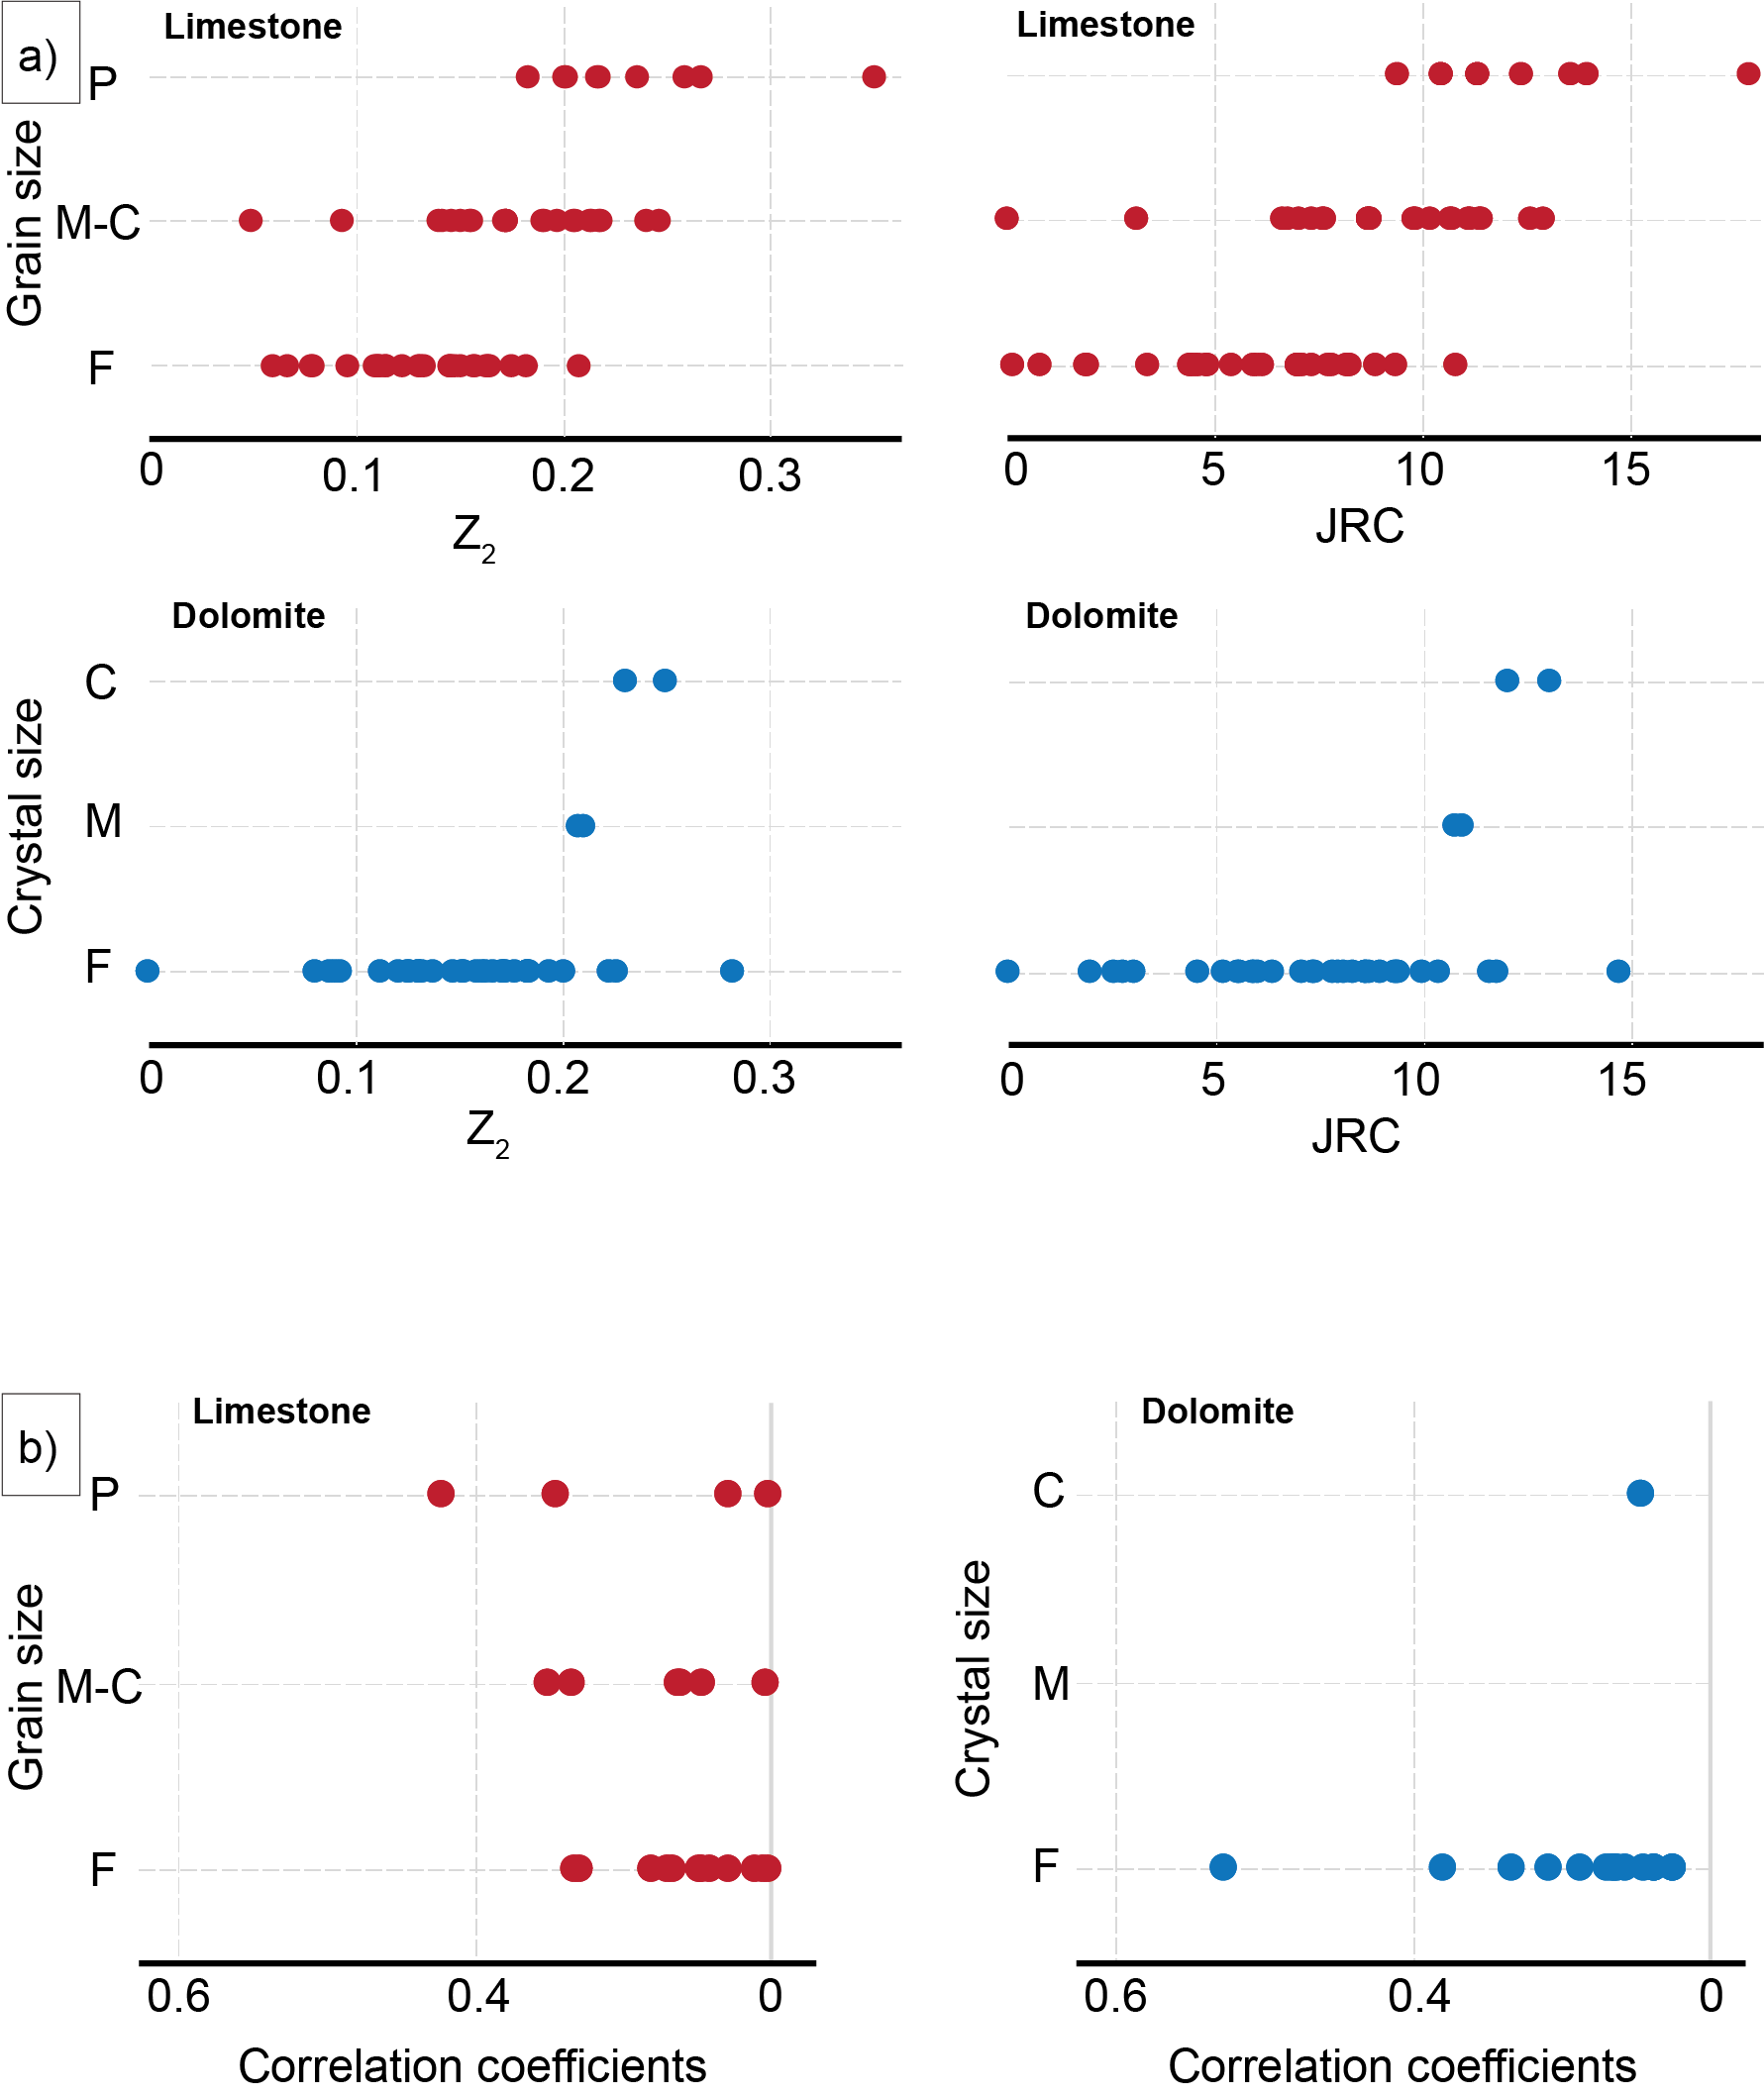


Fig. 3. Measurements on fracture roughness and wall mismatch are correlated to lithology of host rocks, described from core using the conventional methods of Dunham (1962), displaying, a) increasing roughness of limestone fractures with increasing grain size, but this correlation is weak to non-existing in dolomite, and b) increasing probability of wall mismatch, despite limited, with increasing grain size of limestone and no correlation can be established from dolomite fractures. F: Fine, M-C: Medium to course, P: pebble. The roughness measurements in (a) are presented from calculations of the Z2 parameter and equivalent JRCs using a relationship described in the text.


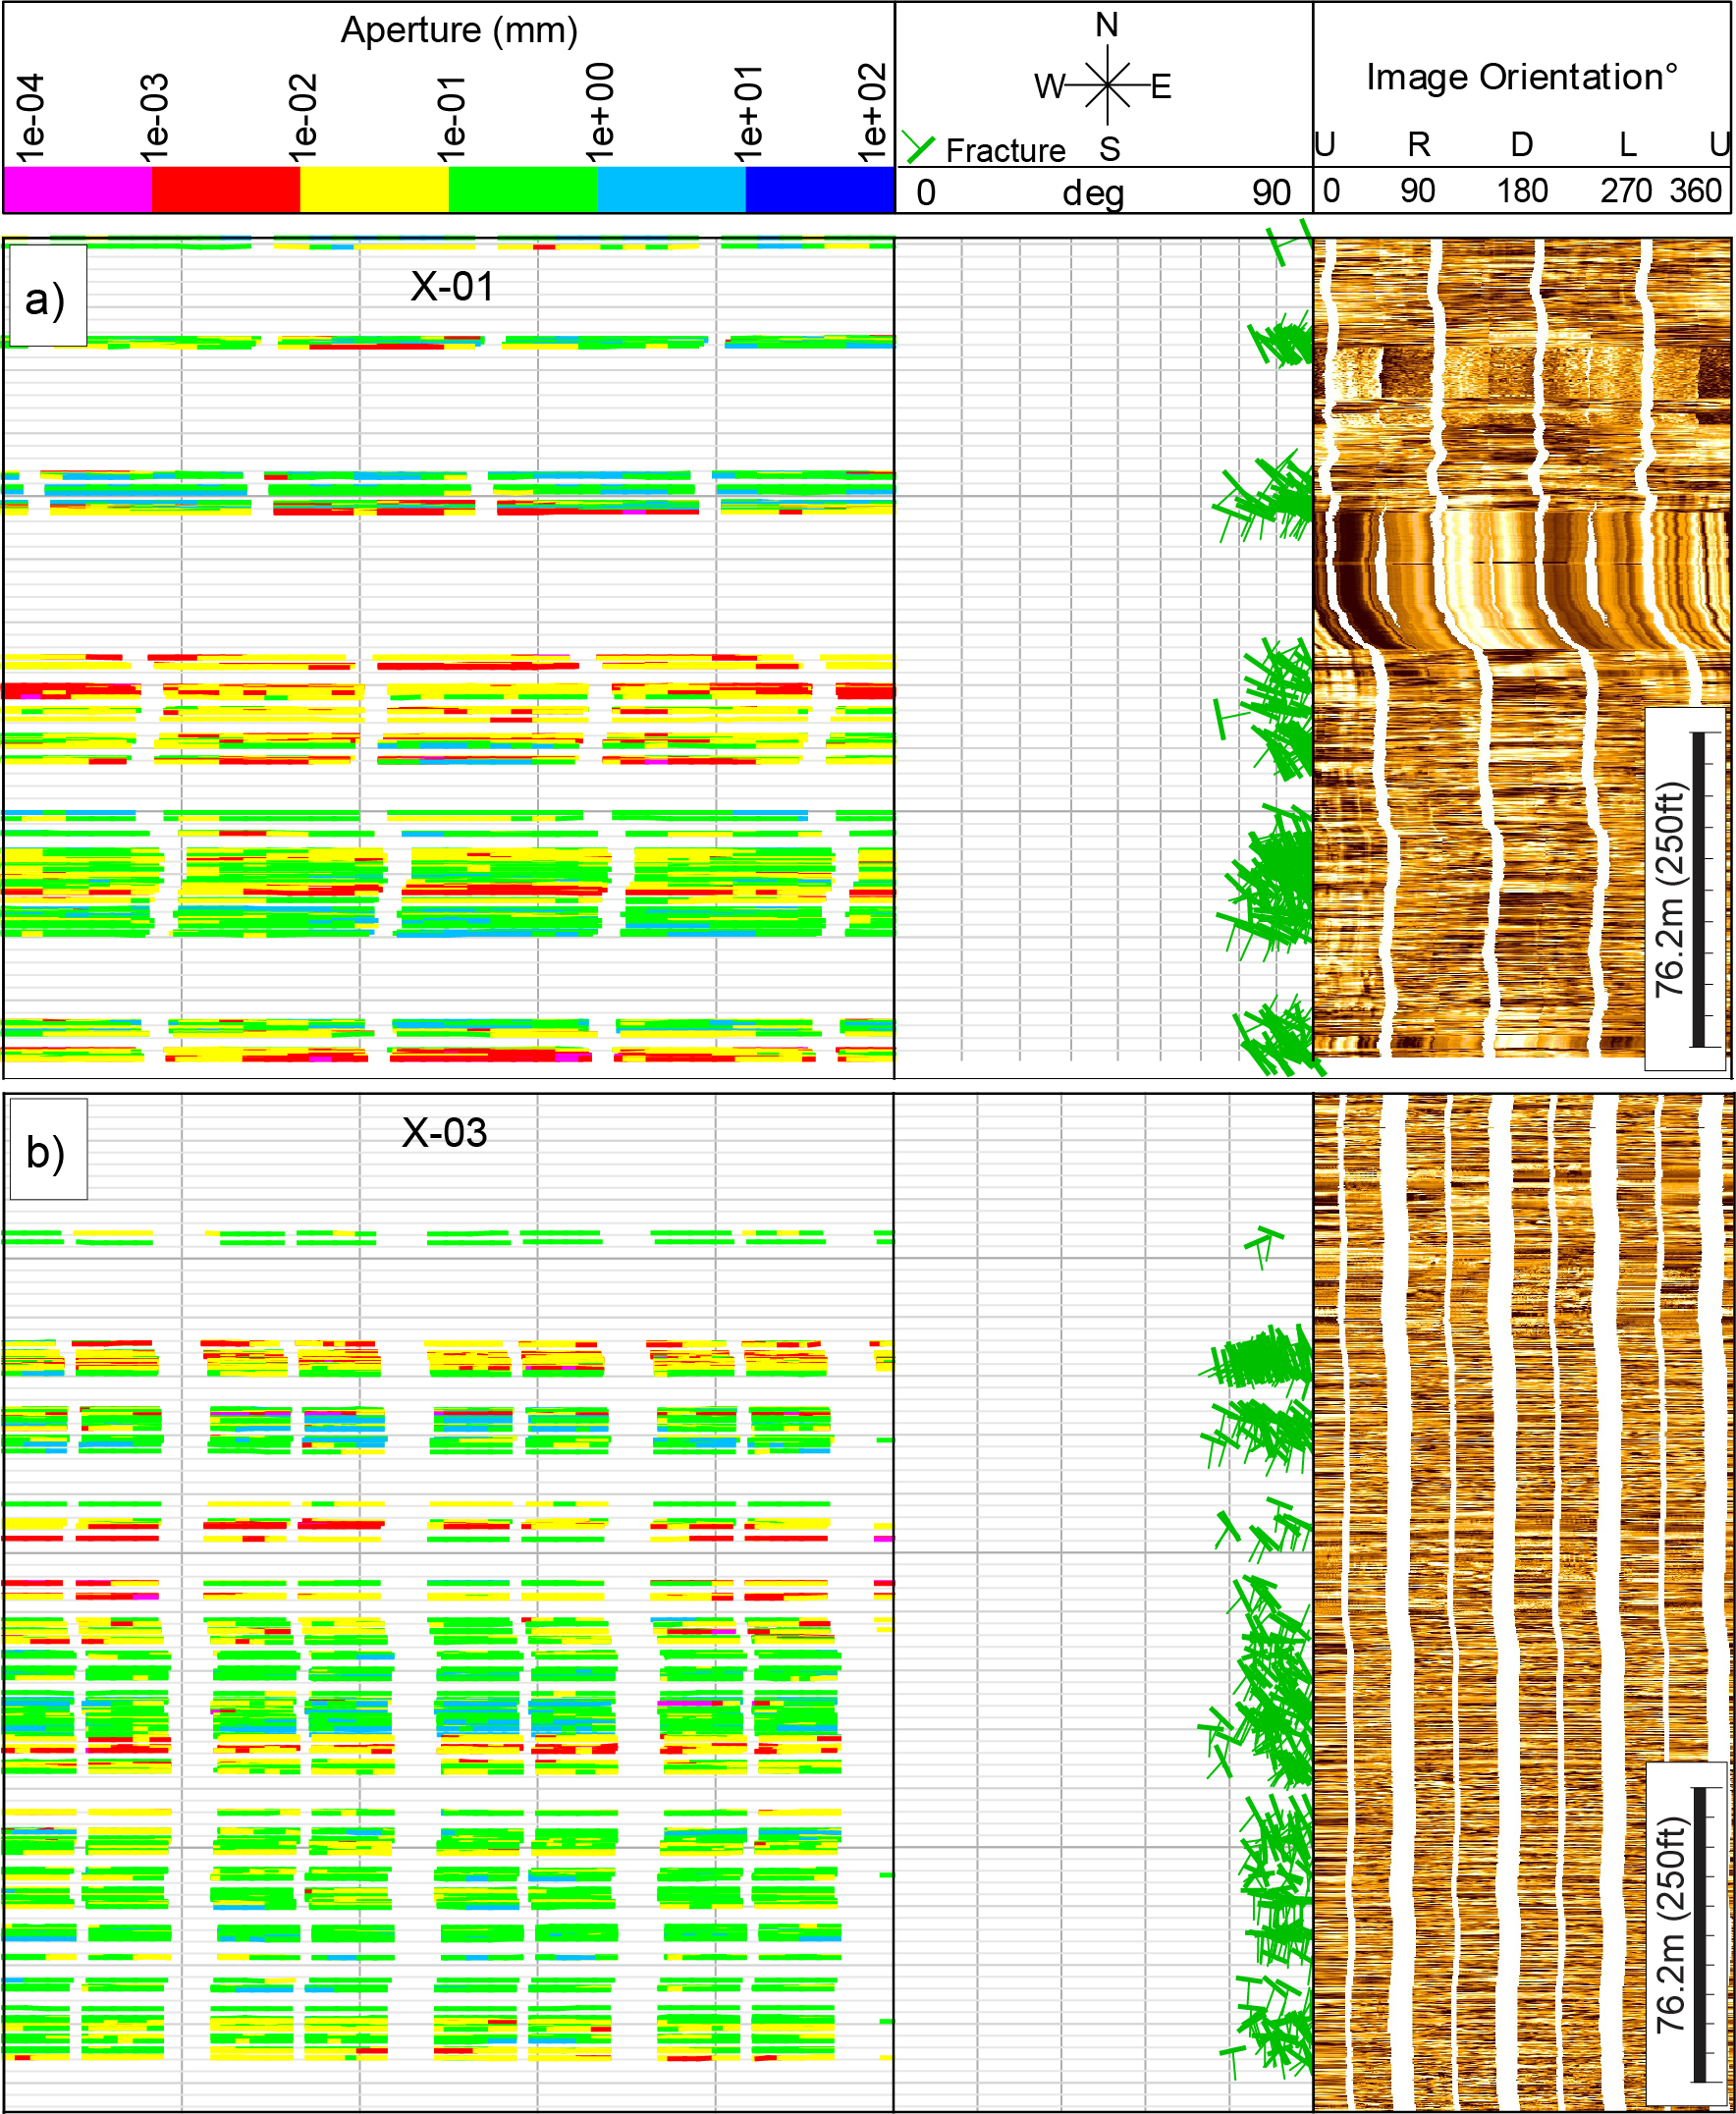
Fig. 4. Apertures of the unfilled fractures, interpreted from the borehole images of a) X-1 and b) X-03 measured using the method presented in (Luthi and Souhaité, 1990), showing variations of size (see color codes of aperture size) due to roughness anisotropy for most fractures especially for X-01.


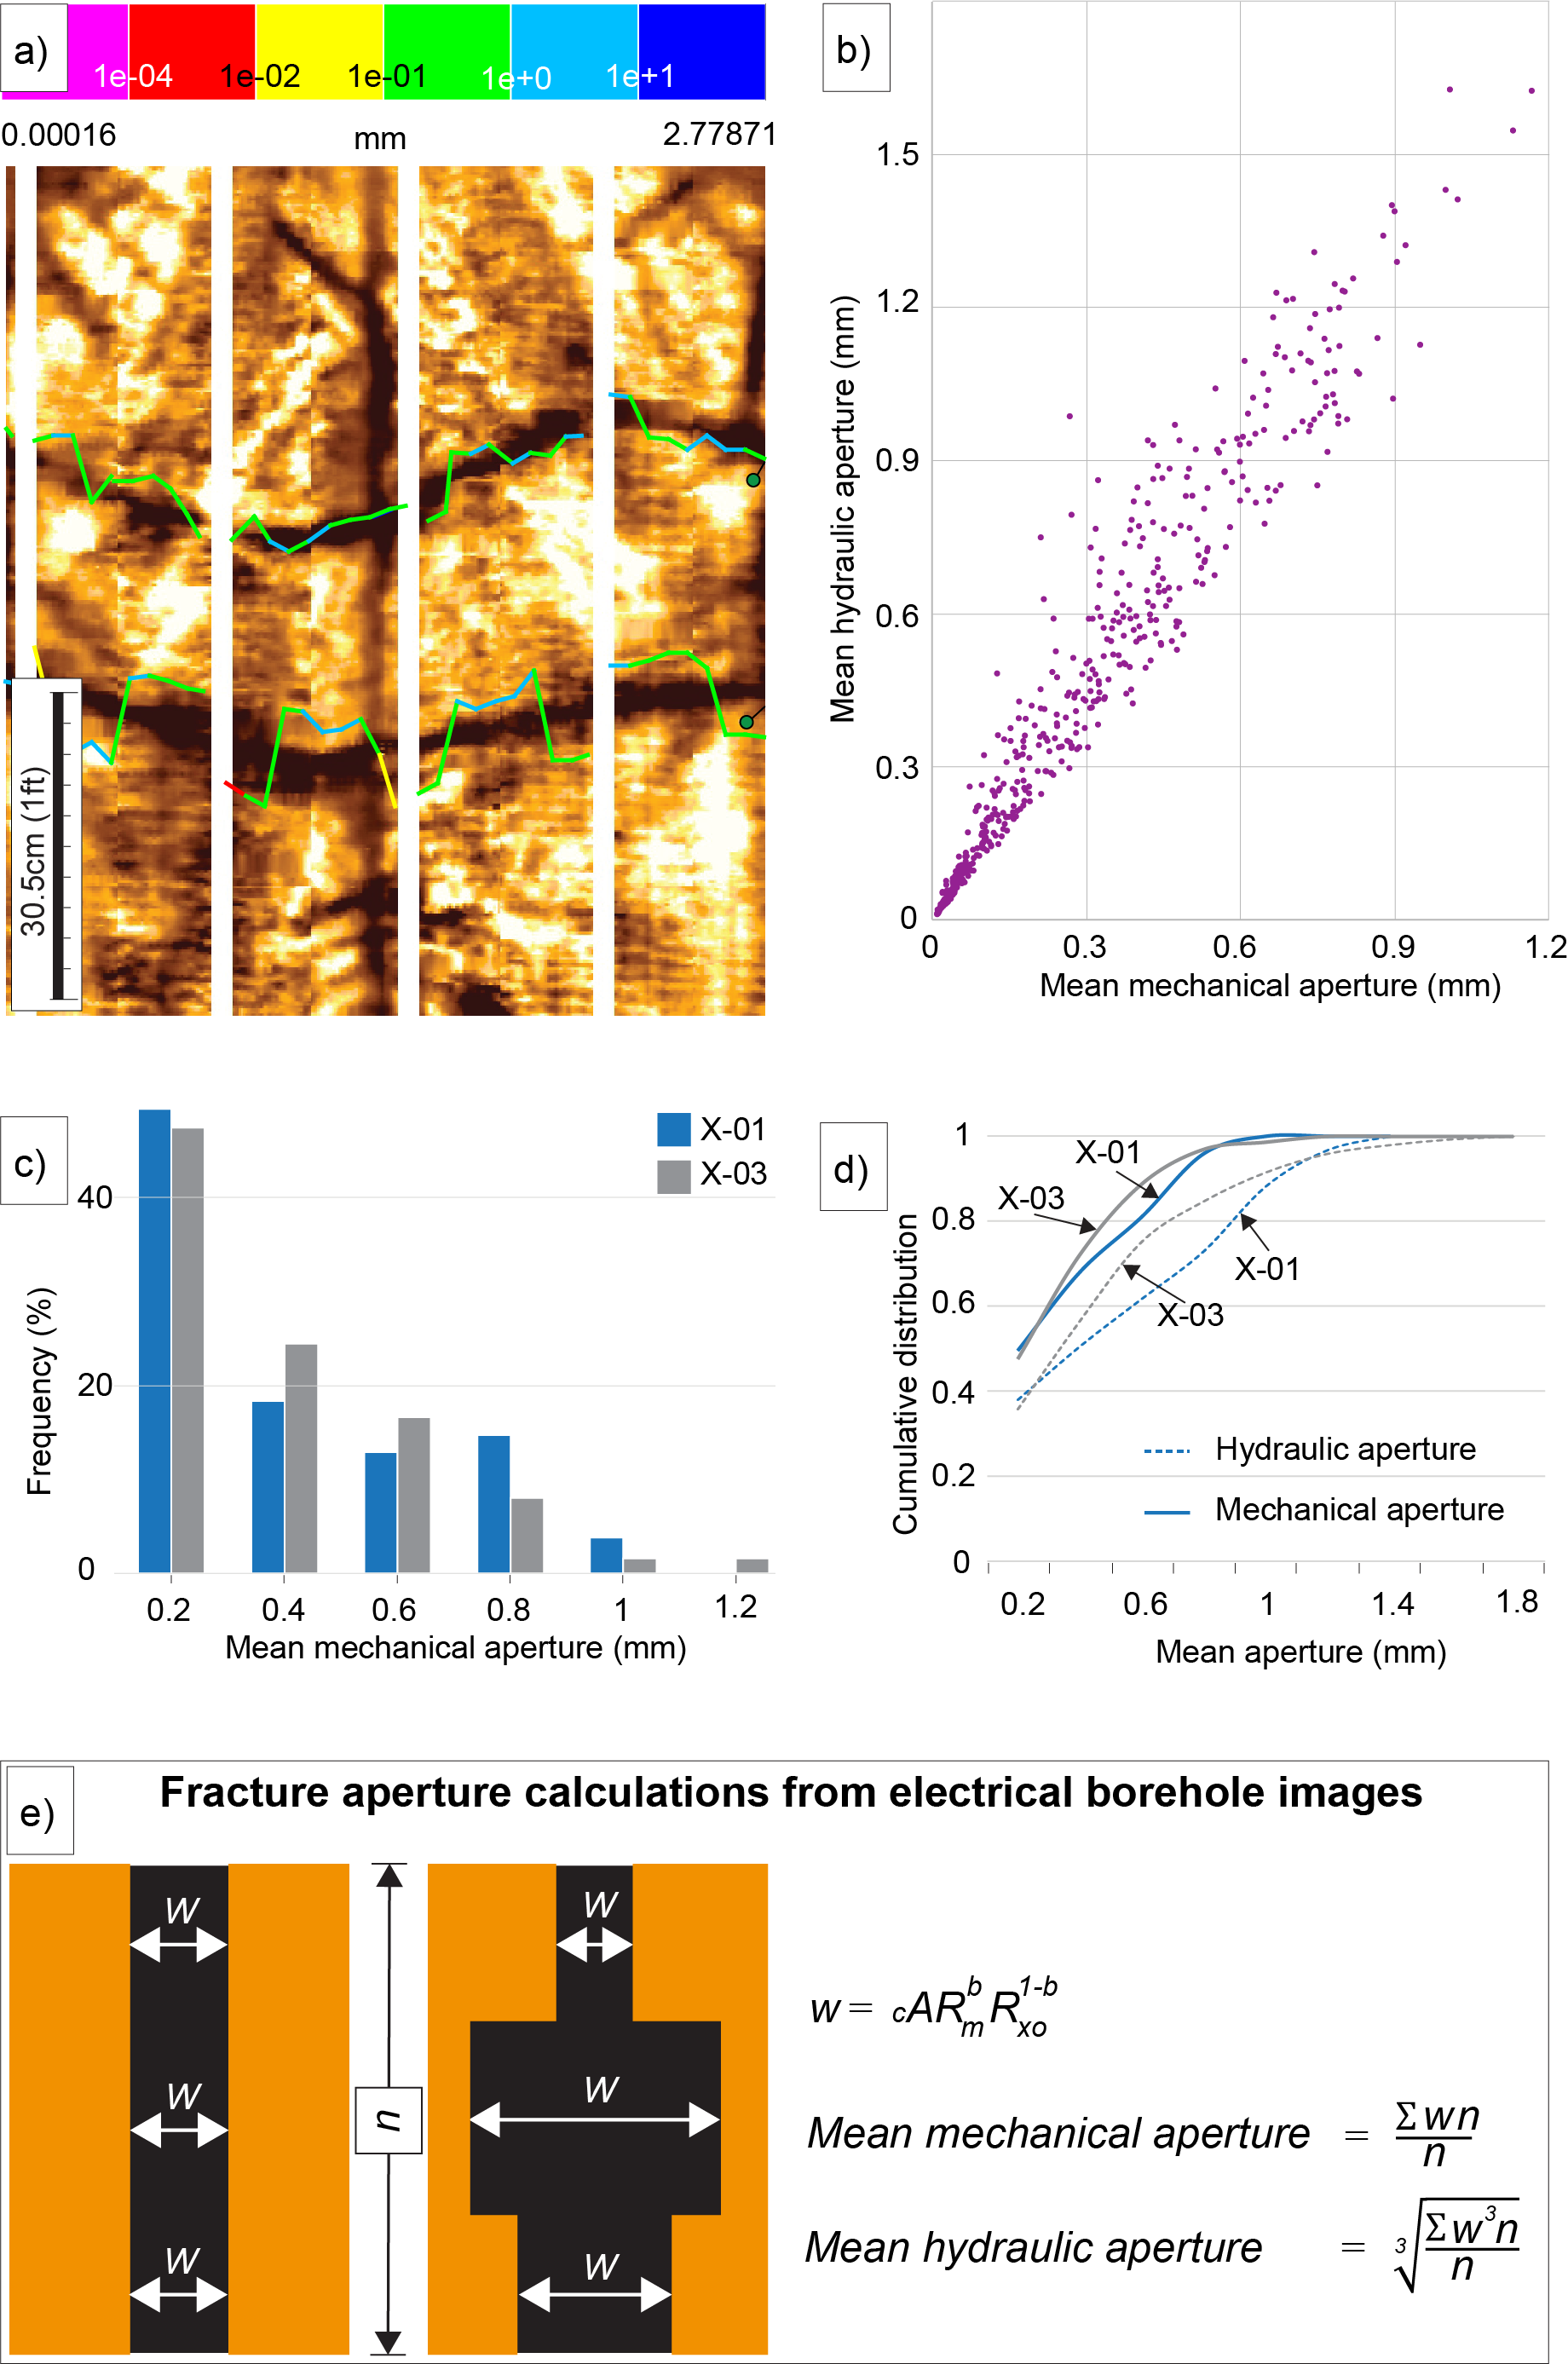
Fig. 5. Measurements of mean apertures from the fractures interpreted from the borehole images of X-1 and X-03 using the method presented in Luthi and Souhaité (1990), a) borehole image showing a varying aperture width (suggesting roughness anisotropy) of two conductive NW-SE trending fractures, b) a cross plot of mean mechanical apertures versus mean hydraulic apertures, c) frequency distributions showing that mean mechanical apertures from X-01 are generally smaller than apertures from X-03, d) cumulative distributions of apertures showing the difference is indicative of rough wall mismatch, and e) graphical representations (modified from Schlumberger’s industrial manual) showing methods of calculating mechanical apertures and hydraulic apertures.

**CITATIONS:**

Dunham, R.J., 1962, Classification of carbonate rocks according to depositional texture, *in* M 1: Classification of Carbonate Rocks--A Symposium, p. 23.

Konert, G., Afifi, a. M., Al-Hajri, S. a., and Droste, H.J., 2001, Paleozoic stratigraphy and hydrocarbon habitat of the Arabian plate: GeoArabia, v. 6, p. 407–442.

Luthi, S.M., and Souhaité, P., 1990, Fracture apertures from electrical borehole scans: Geophysics, v. 55, no. 7, p. 821–833.
